# Supplementary material for: Polish Consumers’ Understanding of Different Front-of-Package Food Labels: A Randomized Experiment
Source: MDPI journal article supplement (doi:10.3390/foods11010134), 2022-01-05
Supplement: s1 [file s1]

**Table S1.** Polish to English translation of the information featured on each FoPL as displayed on one type of breakfast cereal.

| Reference Intakes                                                                                                                                                                                                                                                                                                | Warning Label                                                                                             | Health Star Rating                                                                                                                                                                                                                                        | Nutri-Score                                                                                  | Multiple Traffic Lights                                                                                                                                                                                                                                                                                                                                                                                 |
|------------------------------------------------------------------------------------------------------------------------------------------------------------------------------------------------------------------------------------------------------------------------------------------------------------------|-----------------------------------------------------------------------------------------------------------|-----------------------------------------------------------------------------------------------------------------------------------------------------------------------------------------------------------------------------------------------------------|----------------------------------------------------------------------------------------------|---------------------------------------------------------------------------------------------------------------------------------------------------------------------------------------------------------------------------------------------------------------------------------------------------------------------------------------------------------------------------------------------------------|
|  <p>Each portion of 30g contains:</p> <p>Energy value: 113kcal (6%)<br/>Sugars: 2,4g (3%)<br/>Fat: 0,2g (&lt;1%)<br/>Saturated fat: &lt;0,1g (&lt;1%)<br/>Salt: 0,3g (5%)</p> <p><i>Daily reference intake for an adult</i></p> |  <p>High in calories</p> |  <p>Health value rating expressed as number of stars: 3,5</p> <p>Energy value: 378kcal<br/>Saturated fat: &lt;0,1g<br/>Sugars: 8g<br/>Sodium: 390mg</p> <p>per 100g</p> |  <p>B</p> |  <p>Each portion of 30g contains:</p> <p>Energy value: 113kcal (6%)<br/>Sugars: 2,4g (3% - medium)<br/>Fat: 0,2g (&lt;1% - low)<br/>Saturated fat: &lt;0,1g (&lt;1% - low)<br/>Salt: 0,3g (5% - medium)</p> <p><i>Daily reference intake for an adult</i><br/><i>Typical nutritional value per 100g: 378kcal</i></p> |
